# Supplementary material for: Impact of Long-Term Home and Community Use of a Lower Limb Sensory Neuroprosthesis
Source: Research Square preprint supplement (doi:10.21203/rs.3.rs-7412528/v1), 2025-09-19
Supplement: Supplementary file 1 [file c3687bc66fbc19add740beb4.docx]

**Supplementary Materials**

**Supplementary Table 1.** ABC Score Throughout Home Use of a Sensory Neuroprosthesis. Overall changes in ABC scores throughout the SNP home use trial were not statistically significant despite the participant suffering a fall on ice (unrelated to SNP use) between the Pre-Active 2 and Active 1 evaluations. This result is likely due to the very high functioning nature of the SNP recipient. Scores highlighted in light green and red indicate an improvement and reduction in balance confidence, respectively, when compared to the preceding evaluation time point.

|  | Score (%) | | | | | |
| --- | --- | --- | --- | --- | --- | --- |
| *How confident are you that you will not lose your balance or become unsteady when you…* | **Baseline** | **Pre-Active SNP** | **Active SNP 1** | **Active SNP 2** | **SNP Withdrawal** | **Final** |
| walk around the house? | 100 | 100 | 90 | 100 | 100 | 100 |
| walk up or down stairs? | 80 | 80 | 70 | 90 | 80 | 90 |
| bend over and pick up a slipper from the front of a closet floor? | 100 | 100 | 100 | 100 | 100 | 100 |
| reach for a small can off a shelf at eye level? | 100 | 100 | 100 | 100 | 100 | 100 |
| stand on your tiptoes and reach for something above your head? | 100 | 100 | 90 | 100 | 90 | 100 |
| stand on a chair and reach for something? | 80 | 80 | 70 | 90 | 80 | 80 |
| sweep the floor? | 100 | 100 | 100 | 100 | 100 | 100 |
| walk outside the house to a car parked in the driveway? | 100 | 100 | 90 | 100 | 100 | 100 |
| get into or out of a car? | 100 | 100 | 100 | 100 | 100 | 100 |
| walk across a parking lot to the mall? | 100 | 100 | 100 | 100 | 100 | 100 |
| walk up or down a ramp? | 100 | 100 | 80 | 100 | 90 | 100 |
| walk in a crowded mall where people rapidly walk past you? | 100 | 100 | 90 | 90 | 90 | 100 |
| are bumped into by people as you walk through the mall? | 80 | 80 | 80 | 90 | 80 | 80 |
| step onto or off an escalator while you are holding onto a railing? | 100 | 100 | 90 | 90 | 100 | 100 |
| step onto or off an escalator while holding onto parcels such that you cannot hold onto the railing? | 80 | 100 | 80 | 90 | 90 | 90 |
| walk outside on icy sidewalks? | 80 | 80 | 70 | 80 | 80 | 80 |
| Score | **93.75** | **95** | **87.5** | **95** | **92.5** | **95** |
| Median | **100** | **100** | **90** | **100** | **95** | **100** |

**Supplementary Figure 1**. Observed changes in SF-36 scores throughout the home use trial of a SNP. Because the SF-36 is a generalized quality of life outcome measure non-specific to lower extremity function, life adjustments and challenges due to the Covid-19 pandemic and the participant sustaining a shoulder injury during the trial, unrelated to SNP use, could have confounded results. This limited the ability to make accurate conclusions on the influence home SNP use can have on the quality of life for an individual with lower limb loss.

**Supplementary Figure 2**. Changes in Modified PEQ scores throughout the home use trial of a SNP. No significant trends were observed for each subscale. When completing this measure at each evaluation, the participant was not instructed to focus answers strictly as they relate to use of the SNP. Since the SNP did not alter the socket fit or biomechanical functionality of the user’s personal prosthesis, issues unrelated to the SNP could have influenced responses.

**Supplementary Table 2**. Changes in FES-I scores throughout the home use trial of a SNP.

| Falls Efficacy Scale - International | | |
| --- | --- | --- |
| Time Point | Score | Score Interpretation |
| Pre-Active 1 | 20 | Moderate concern about falling |
| Pre-Active 2 | 18 | Low concern about falling |
| Active 1 | 22 | Moderate concern about falling |
| Active 2 | 21 | Moderate concern about falling |
| Post-Active 1 | 22 | Moderate concern about falling |
| Post-Active 2 | 20 | Moderate concern about falling |
